# Supplementary material
Source: HighWire-hosted journal article supplement (https://diabetes.diabetesjournals.org/content/suppl/2008/06/12/db07-1311)

Supplementary Data:

**Supplementary Figure 1:**

- A) Cellular gene expression stabilizes in human adipose tissue explants after 3 d of incubation
- B) Cellular gene expression can be stabilized by IBMX supplementation.

**Supplementary Figure 1 A**

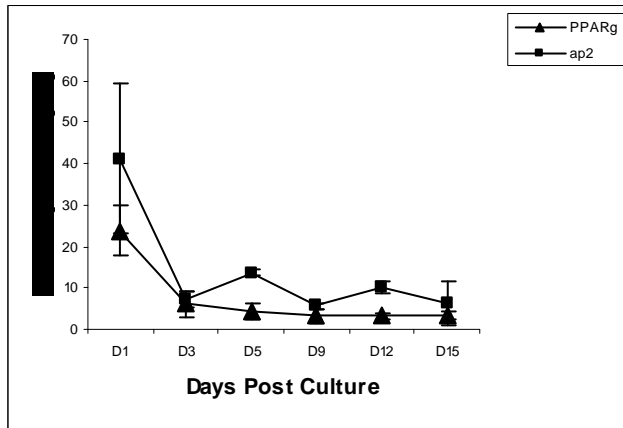

**Supplementary Figure 1 B**

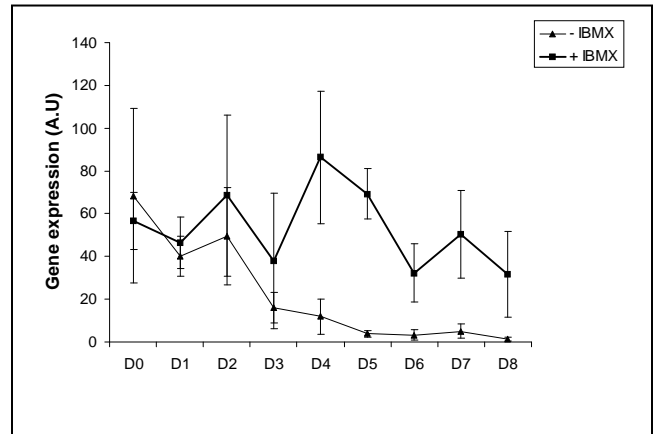

Supplementary Figure 2. Time course of glucose uptake by explants.

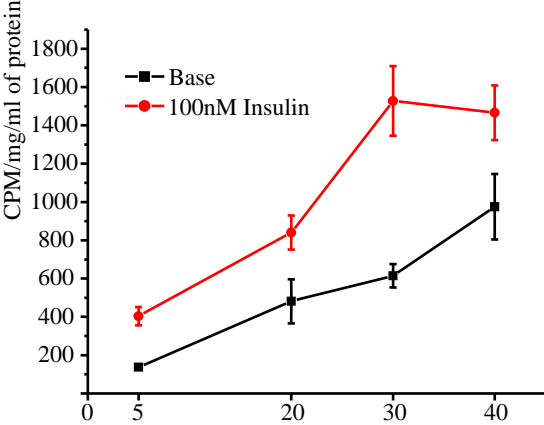

**Supplementary Figure 3: Fasting glucose (mg/dL) in diabetic and non-diabetic subjects**

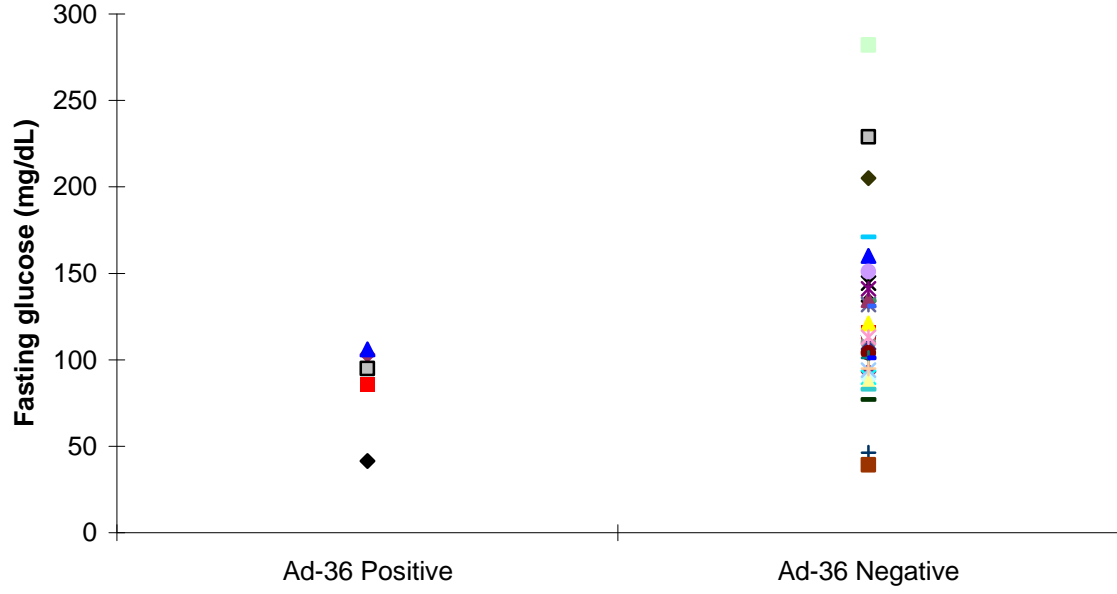

Supplementary Figure 4: HbA1c (%) in obese diabetic subjects

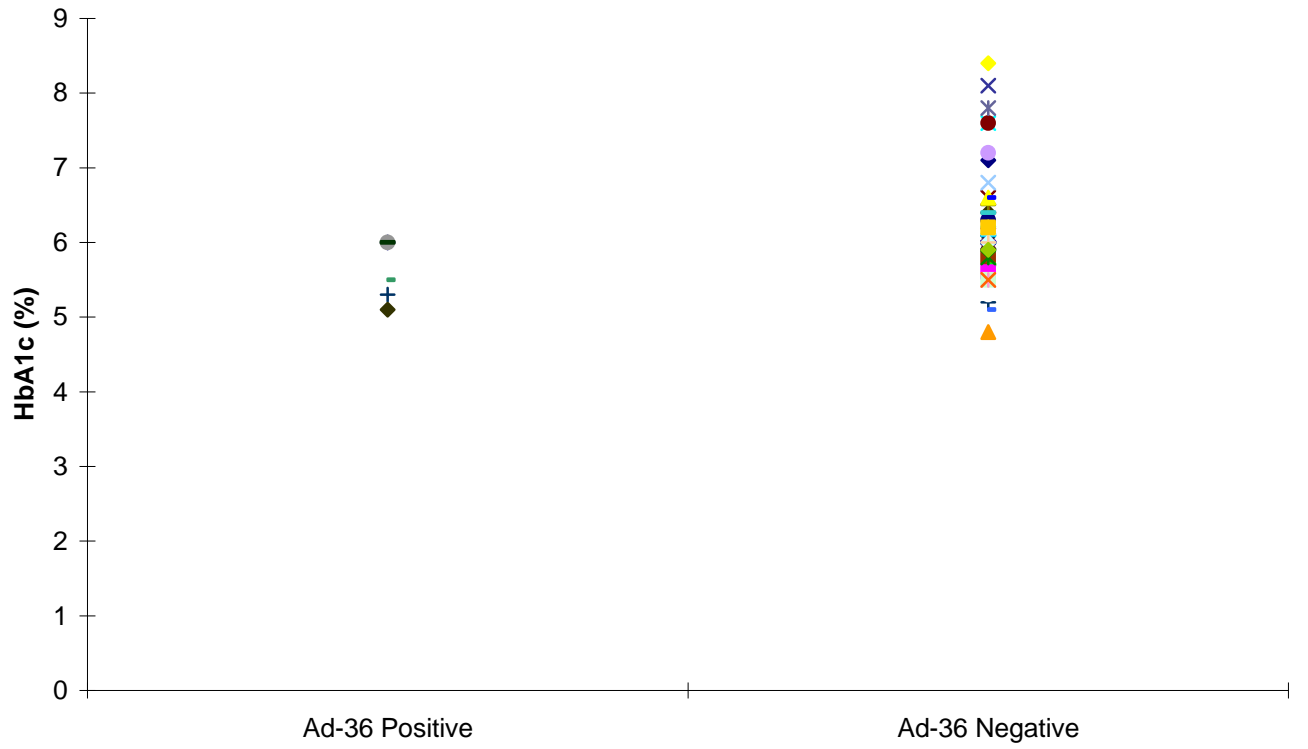

Supplement: ExplantManuscript1.Final-Apr08-Supplementary_Figures.pdf [file ExplantManuscript1.Final-Apr08-Supplementary_Figures.pdf]
